# Supplementary material
Source: PubMed Central journal article supplement (PMC3646958)
Supplement: NIHMS457006-supplement-2.pdf [file NIHMS457006-supplement-2.pdf]

Fig. S2

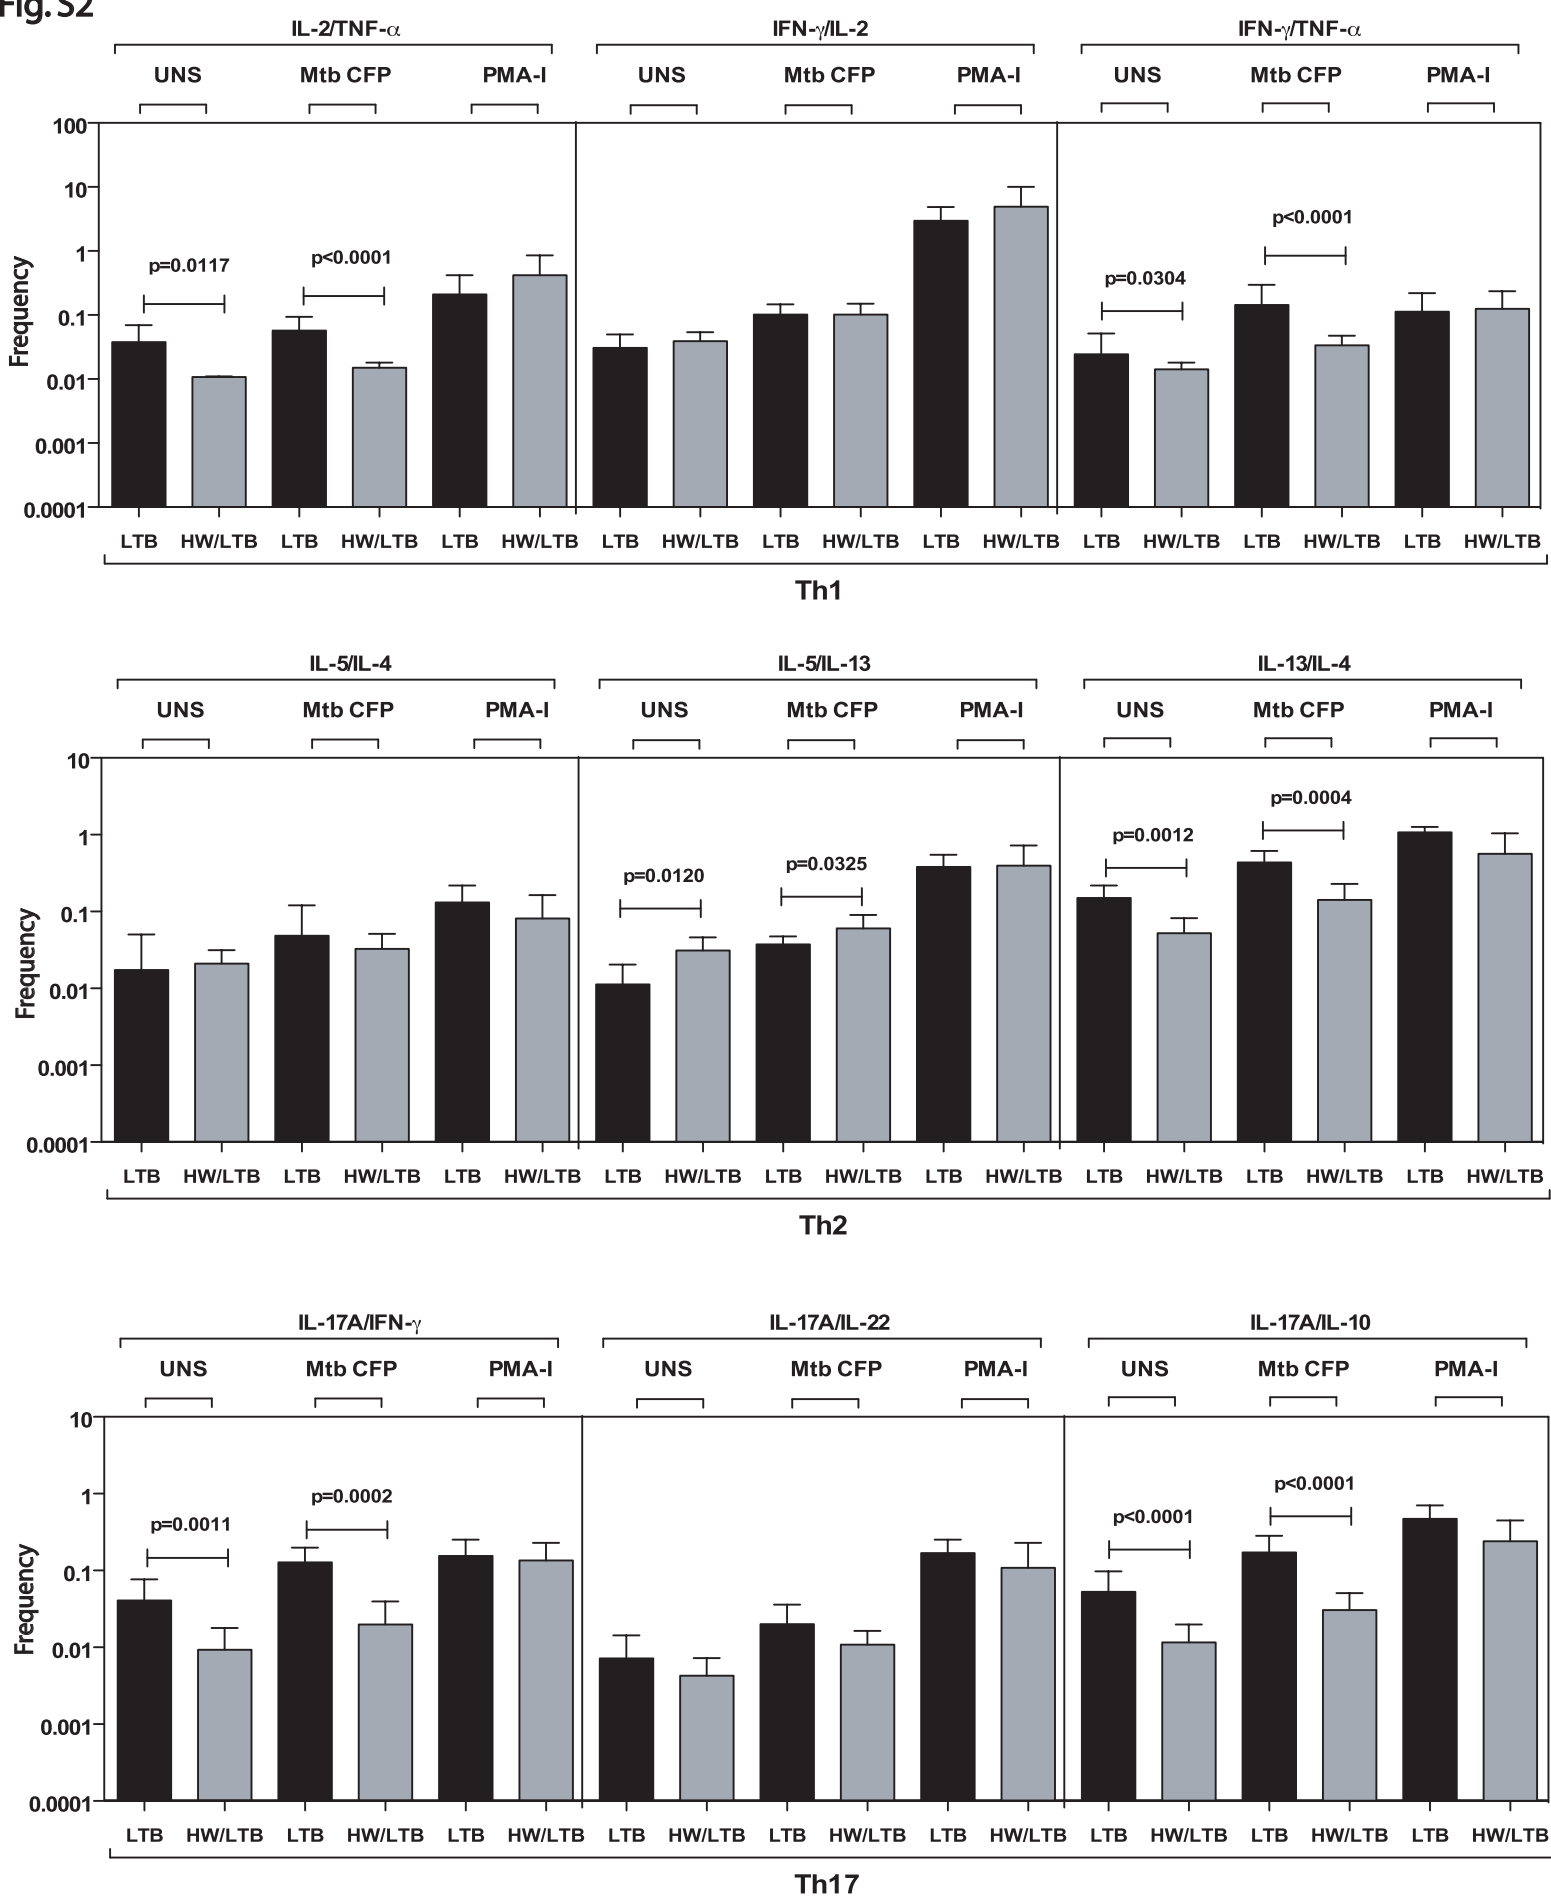

Figure S2. Hookworm infection is associated with decreased baseline and antigen – specific frequencies of dual functional CD4+ Th1 and Th17 cells and increased frequencies of Th2 cells in latent TB. Whole blood was cultured with media alone, total CFP or PMA/ Ionomycin for 6 h and the frequencies of CD4+ Th1, Th2 and Th17 cells determined. The raw frequency of CD4+ T cells expressing only dual –functional Th1, Th2 and Th17 cytokines is shown as bar graphs. The bar represents the geometric mean of the frequency of CD4+ T cells expressing the respective cytokine(s), and the error bar represents the 95% confidence interval in hookworm uninfected (LTB, n = 21) and hookworm infected (HW/LTB, n = 21) latent TB individuals. P values were calculated using the Mann Whitney test.
