# Supplementary material
Source: PubMed Central journal article supplement (PMC3646958)
Supplement: NIHMS457006-supplement-3.pdf [file NIHMS457006-supplement-3.pdf]

Fig.S3

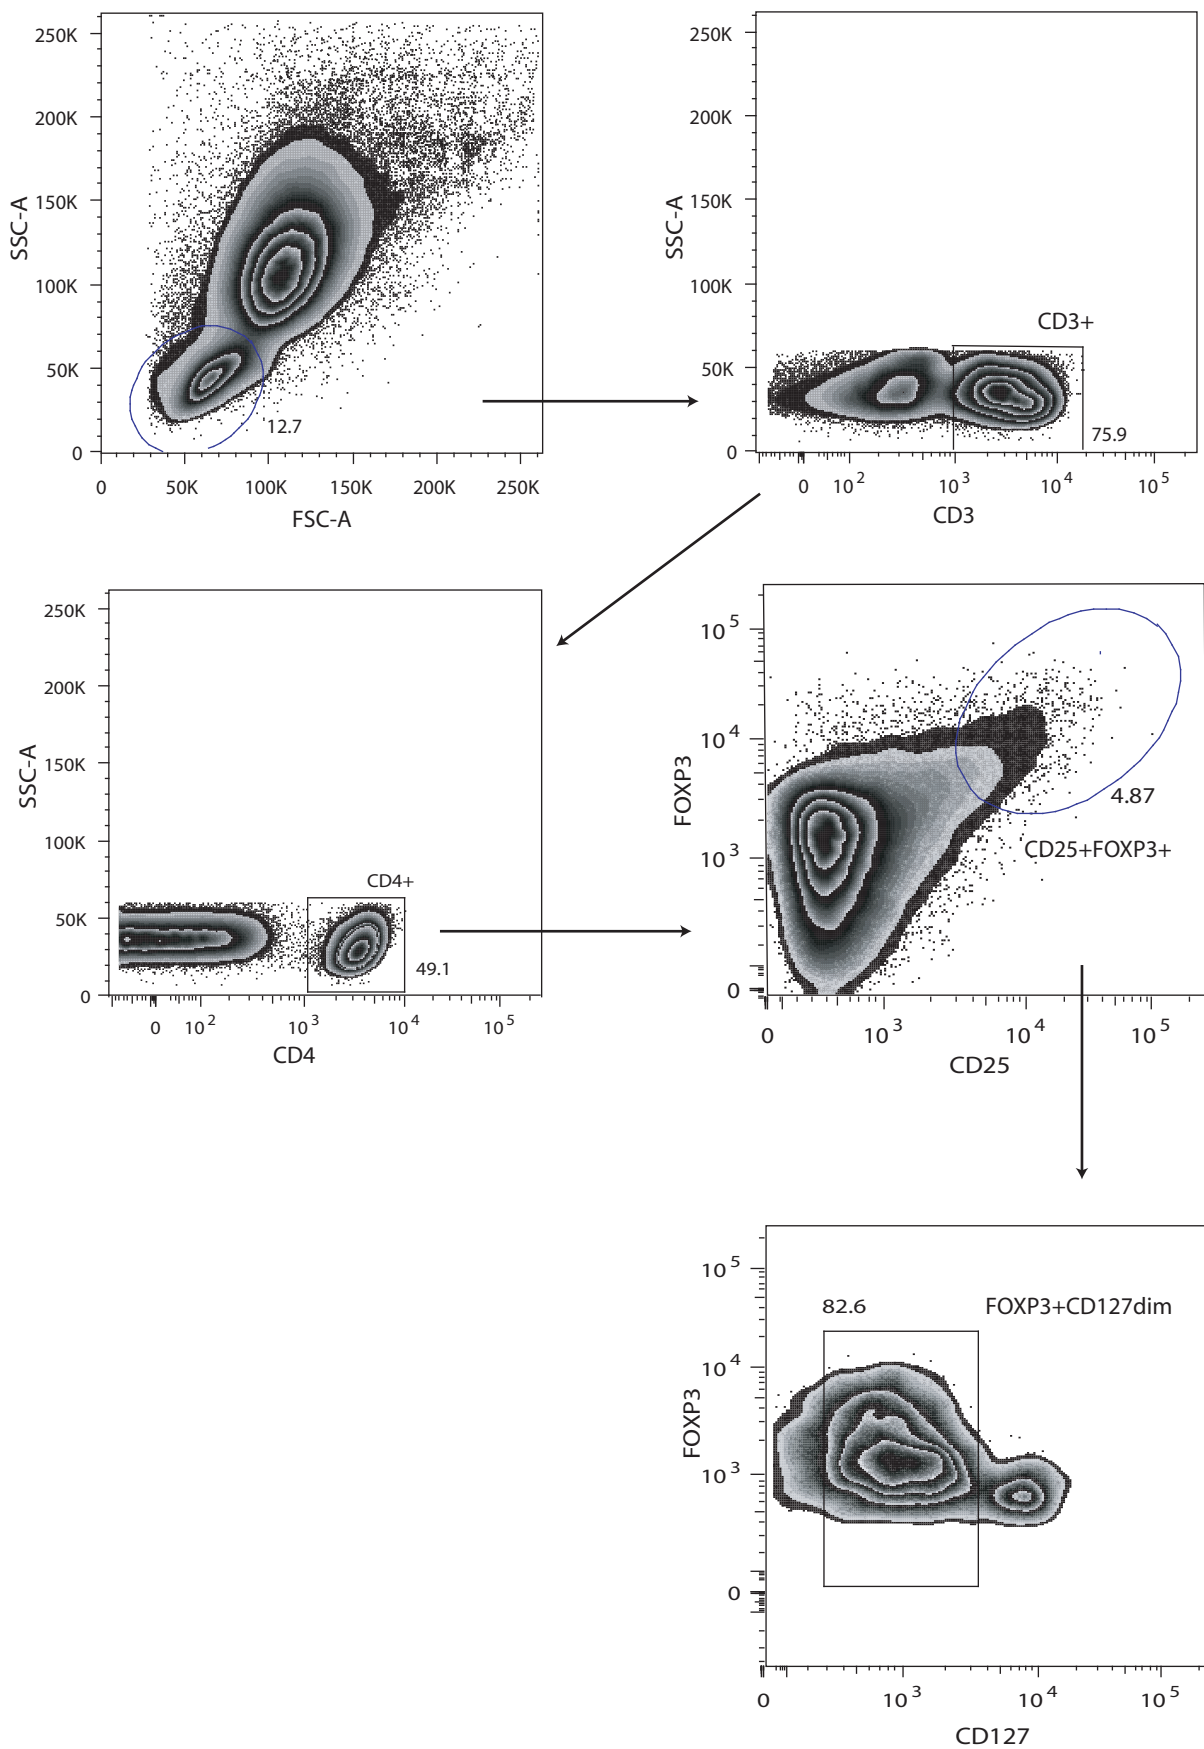

Figure S3. Gating strategy for estimating frequencies of CD4+ nTregs. A representative flow cytometry plot showing the gating strategy for estimation of nTregs. nTregs were classified as CD4+CD25+Foxp3+CD127dim.
